# Supplementary material for: PRPF8 is important for BRCA1-mediated homologous recombination
Source: PubMed Central journal article supplement (PMC5706798; doi:10.18632/oncotarget.21555), 2017-10-06
Supplement: oncotarget-08-93319-s001.pdf [file oncotarget-08-93319-s001.pdf]

# PRPF8 is important for BRCA1-mediated homologous recombination

## SUPPLEMENTARY MATERIALS

### DSB reporter assays

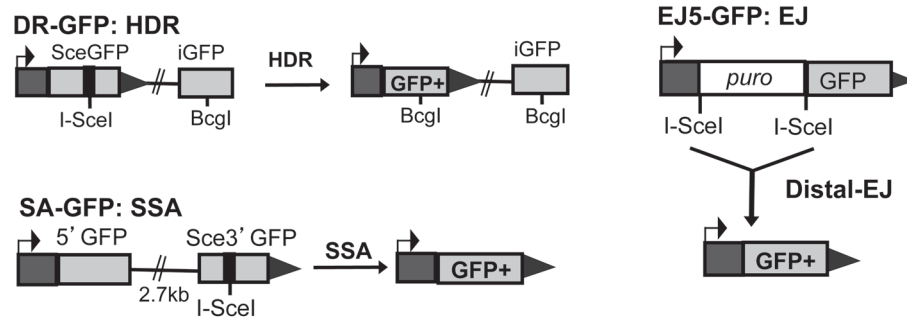

Supplementary Figure 1: Shown are diagrams of the DR-GFP, SA-GFP, and EJ5-GFP reporter assays.
